## **Correction: Quantitative Characteristics of Gene Regulation by Small RNA**

Erel Levine, Zhongge Zhang, Thomas Kuhlman, Terence Hwa

Correction for:

Levine E, Zhang Z, Kuhlman T, Hwa T (2007) Quantitative characteristics of gene regulation by small RNA. *PLoS Biol* 5(9): e229. doi:10.1371/journal.pbio.0050229

The authors would like to add the second author, Dr. Zhang, as a second corresponding author. He can be contacted by e-mail at [zzhongge@biomail.ucsd.edu](mailto:zzhongge@biomail.ucsd.edu).

Citation: Levine E, Zhang Z, Kuhlman T, Hwa T (2008) Correction: Quantitative Characteristics of Gene Regulation by Small RNA. *PLoS Biol* 6(1): e5. doi: 10.1371/journal.pbio.0060005

Received: November 20, 2007; Accepted: November 20, 2007; Published: January 29, 2008

Copyright: © 2008 Levine et al. This is an open-access article distributed under the terms of the Creative Commons Attribution License, which permits unrestricted use, distribution, and reproduction in any medium, provided the original author and source are credited.

## **Correction: Relationship Between Mitochondrial Electron Transport Chain Dysfunction, Development, and Life Extension in *Caenorhabditis elegans***

Shane L. Rea, Natascia Ventura, Thomas E. Johnson

Correction for:

Rea SL, Ventura N, Johnson TE (2007) Relationship between mitochondrial electron transport chain dysfunction, development, and life extension in *Caenorhabditis elegans*. *PLoS Biol* 5(10): e259. doi:10.1371/journal.pbio.0050259

The corresponding author's e-mail is incorrect. It should be: [reas3@uthscsa.edu](mailto:reas3@uthscsa.edu).

Citation: Rea SL, Ventura N, Johnson TE (2008) Correction: Relationship Between Mitochondrial Electron Transport Chain Dysfunction, Development, and Life Extension in *Caenorhabditis elegans*. *PLoS Biol* 6(1): e23. doi:10.1371/journal.pbio.0060023

Received: December 17, 2007; Accepted: December 17, 2007; Published: January 29, 2008

Copyright: © 2008 Rea et al. This is an open-access article distributed under the terms of the Creative Commons Attribution License, which permits unrestricted use, distribution, and reproduction in any medium, provided the original author and source are credited.
